# Supplementary material for: Factors affecting the negative Poisson's ratio of black phosphorus and black arsenic: electronic effects
Source: Royal Society of Chemistry journal article supplement (doi:10.1039/d0cp05005a), 2021-01-01
Supplement: d0cp05005a1.pdf [file d0cp05005a1.pdf]

## Supporting materials

# Factors Affecting the Negative Poisson's Ratio of Black Phosphorus and Black Arsenic: Electron Effect

Yifan Gao, Minru Wen, Xin Zhang, Fugen Wu, Qinglin Xia, Haoyi Wu, Huafeng  
Dong\*

### Contact information:

Corresponding author: Huafeng Dong

Email: hfdong@gdut.edu.cn

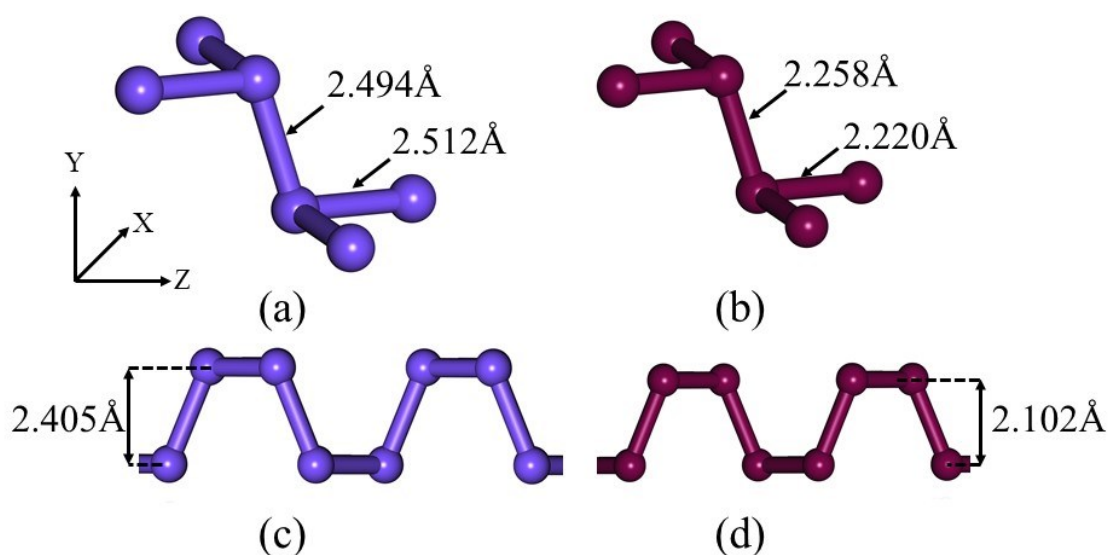

**Figure S1.** (a) Atomic structure of single-layer  $\beta$ -As. (b) Atomic structure of single-layer BP. (c) Thickness of single-layer  $\beta$ -As in the vacuum layer direction. (d) Thickness of single-layer BP in the vacuum layer direction.

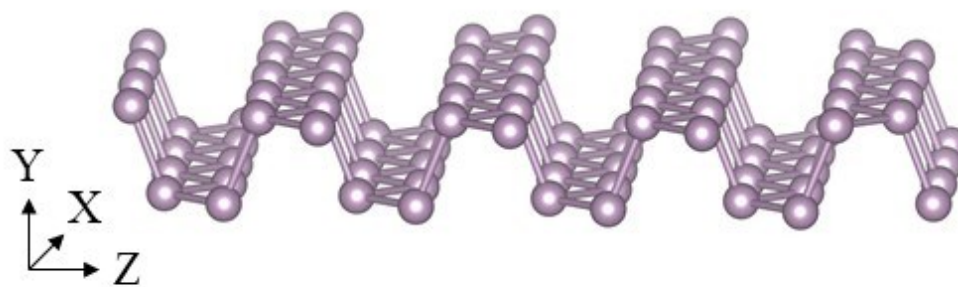

(a)

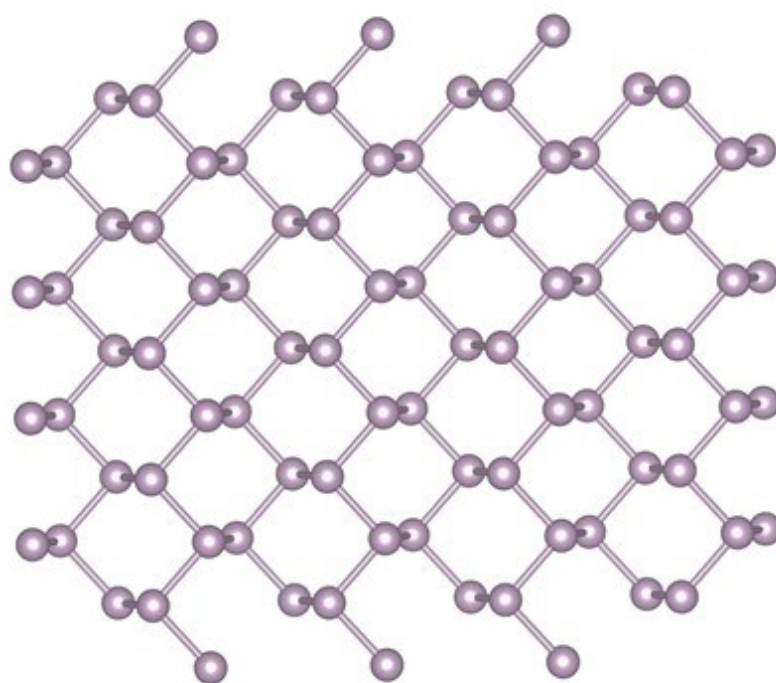

(b)

**Figure S2.** Single-layer BP (a) side view. (b) Top view

**Table S1.** The strain of BP and  $\beta$ -As along the X and Y directions.

| $\varepsilon_x$ (BP) | $\varepsilon_y$ | $\varepsilon_x$ ( $\beta$ -As) | $\varepsilon_y$ |
|----------------------|-----------------|--------------------------------|-----------------|
| -5%                  | -0.00646        | -5%                            | -0.01718        |
| -4%                  | -0.00642        | -4%                            | -0.01481        |
| -3%                  | -0.00539        | -3%                            | -0.01044        |
| -2%                  | -0.00415        | -2%                            | -0.00835        |
| -1%                  | -0.00315        | -1%                            | -0.00450        |
| 0%                   | 0               | 0%                             | 0               |
| 1%                   | 0.00086         | 1%                             | 0.00413         |
| 2%                   | 0.00487         | 2%                             | 0.00892         |
| 3%                   | 0.00646         | 3%                             | 0.01338         |
| 4%                   | 0.01041         | 4%                             | 0.01817         |
| 5%                   | 0.01330         | 5%                             | 0.02102         |
